# Supplementary material for: Highly Pathogenic Influenza A(H5N1) Virus Survival in Complex Artificial Aquatic Biotopes
Source: PLoS One. 2012 Apr 13;7(4):e34160. doi: 10.1371/journal.pone.0034160 (PMC3325971; doi:10.1371/journal.pone.0034160)
Supplement: Table S5 — Viral load (number of H5 RNA copies/g) measured in different mussel organs obtained in experiment C.2 (virus A/Cambodia/408008/2005). (DOC) [file pone.0034160.s006.doc]

**Supplementary Table 5. Viral load (number of H5 RNA copies/g) measured in different mussel organs obtained in experiments C.2 (virus A/Cambodia/408008/2005).**

|  |  | **Mussel organs** | | | |
| --- | --- | --- | --- | --- | --- |
|  | **Day of incubation** | **Gills** | **Intestine** | **Digestive gland** | **Remaining carcass** |
| **Mussel immersed in contaminated water (M-Infa) (experiment C.2.a)** | M-Infa* Day 1 | 1.70106 | 2.30105 | 3.20104 | 2.40105 |
| M-Infa* Day 2 | 2.20105 | 9.94104 | 1.73104 | 4.91103 |
| M-Infa* Day 3 | 2.70105 | 6.96102 | 3.27105 | 1.27105 |
| M-Infa* Day 4 | 7.50102 | 2.10104 | 1.14104 | 7.38104 |
| M-Infa* Day 5 | 3.23103 | 1.09103 | 6.97102 | 3.74102 |
| M-Infa* Day 6 | Negative | Negative | Negative | 1.46  104 |
| M-Infa Day 7 | 7.21103 | 1.85103 | 9.37102 | 5.79103 |
| M-Infa Day 8 | 2.30104 | 2.10103 | 1.14104 | 1.15104 |
| **Mussel kept 4 days in contaminated water then transferred to non-contaminated water (M-Infb) (experiment C.2.b)** | M-Infb Day 5 | 7.37102 | 1.04103 | 1.36103 | Negative |
| M-Infb Day 6 | Negative | Negative | Negative | Negative |
| **Mussel kept 4 days in contaminated water, 1 day in non-contaminated water then transferred to non-contaminated water (M-Infc) (experiment C.2.c)** | M-Infc Day 6 | 4.20103 | 2.80105 | Negative | 5.69103 |
| M-Infc Day 7 | 1.39104 | 8.28103 | 5.95103 | 9.70104 |
| M-Infc Day 8 | 6.43102 | Negative | 5.35102 | 2.85103 |
| **Mussel exposed (M-Exp) to contaminated mussel (M-Infc) (experiment C.2.c)** | M-Exp Day 6 | 1.13103 | 5.80101 | 3.47103 | 4.58103 |
| M-Exp Day 7 | 2.04104 | 2.74104 | 1.14104 | 3.43105 |
| M-Exp Day 8 | Negative | Negative | Negative | Negative |

* Mussel in which infectious virus particles were detected
