# Supplementary material for: Highly Pathogenic Influenza A(H5N1) Virus Survival in Complex Artificial Aquatic Biotopes
Source: PLoS One. 2012 Apr 13;7(4):e34160. doi: 10.1371/journal.pone.0034160 (PMC3325971; doi:10.1371/journal.pone.0034160)
Supplement: Table S6 — Viral load (number of H5 RNA copies/g) in different fish and tadpole organs obtained from experiments D (virus A/chicken/Cambodia/LC1AL/2007). (DOC) [file pone.0034160.s007.doc]

**Supplementary Table 6. Viral load (number of H5 RNA copies/g) in different fish and tadpole organs obtained from experiments D (virus A/chicken/Cambodia/LC1AL/2007)**

|  |  | **Organs** | | | | | |
| --- | --- | --- | --- | --- | --- | --- | --- |
|  | **Day of incubation** | **Gills** | **Intestine** | **scales** | **Fins** | **Brain** | **Remaining carcass** |
| **Fish immersed in contaminated water (F-Infa)**  **(experiment D1)** | F-Infa* Day1 | 4.73106 | 1.85104 | 4.04104 | 1.09105 | 1.85105 | 3.37103 |
| F-Infa Day3 | 1.05106 | 3.84104 | 4.34103 | 1.69106 | 4.76103 | 4.24103 |
| F-Infa Day5 | 2.72104 | 1.00105 | 3.94104 | 1.62106 | 1.10106 | 2.10105 |
| F-Infa Day7 | 2.82104 | 2.93106 | 1.03104 | 1.17104 | 1.08105 | 5.85105 |
| F-Infa Day11 | 1.83106 | 7.02105 | 3.69104 | 1.21105 | 4.11105 | 5.09104 |
| F-Infa Day15 | 7.49105 | 1.19105 | 7.55104 | 1.00105 | 6.74104 | 1.54104 |
| F-Infa Day20 | Negative | 5.42103 | 1.48104 | Negative | Negative | Negative |
| **Tadpole immersed in contaminated water (T-Inf)**  **(experiment D1)** | T-Inf* Day1 | 2.80107 | 6.83106 | NA | NA | NA | 1.79107 |
| T-Inf Day13 | 1.53105 | 2.72105 | NA | NA | NA | 5.82105 |
| T-Inf Day14 | 1.12105 | 9.83104 | NA | NA | NA | 1.55105 |
| **Fish from contaminated water transferred to non-contaminated water (F-Infb)**  **(experiment D2)** | F-Infb Day7 | 3.60106 | 5.50106 | 2.80105 | 1.90103 | 1.37107 | 2.01103 |
| **Fish exposed to contaminated fish (F-exp)**  **(experiment D2)** | F-Exp Day7 | 6.60103 | 3.40104 | 1.64104 | 2.66105 | 1.60106 | 1.40105 |

* Detection of infectious virus particles

NA: not available (no organ tested).
